# Supplementary material for: STOmicsDB: a comprehensive database for spatial transcriptomics data sharing, analysis and visualization
Source: PubMed Central journal article supplement (PMC10767841; doi:10.1093/nar/gkad933), 2023-11-11
Supplement: gkad933_supplemental_file.pdf [file gkad933_supplemental_file.pdf]

**Supplementary Table 2. The corresponding section names in the Figure 4.**

|             | <b>Column1</b> | <b>Column2</b> | <b>Column3</b> | <b>Column4</b> | <b>Column5</b> | <b>Column6</b> |
|-------------|----------------|----------------|----------------|----------------|----------------|----------------|
| <b>Row1</b> | E11.5_E1S1     | E12.5_E1S2     | E13.5_E1S1     | E14.5_E1S1     | E15.5_E1S2     | E16.5_E2S9     |
| <b>Row2</b> | E11.5_E1S2     | E12.5_E1S4     | E13.5_E1S2     | E14.5_E1S2     | E15.5_E1S3     | E16.5_E2S4     |
| <b>Row3</b> | E11.5_E1S3     | E12.5_E1S5     | E13.5_E1S3     | E14.5_E2S1     | E15.5_E1S4     | E16.5_E1S4     |
| <b>Row4</b> | E11.5_E1S4     | E12.5_E2S1     | E13.5_E1S4     | E14.5_E2S2     | E15.5_E2S1     | E16.5_E1S1     |

Note: The first 'E' indicates the day of the development, the second 'E' indicates the mouse number, and the 'S' indicates the section number.  
eg. The E11.5\_E1S1 means the 11.5th day, No.1 mouse, the No.1 section.
